# Supplementary material for: Increased Inflammatory Markers Detected in Nasal Lavage Correlate with Paranasal Sinus Abnormalities at MRI in Adolescent Patients with Cystic Fibrosis
Source: MDPI journal article supplement (doi:10.3390/antiox10091412), 2021-09-03
Supplement: s1 [file s1]

Online Supplement.

**Table S1.** An overview of the bacterial colonization of the study population with the corresponding CRS MRI sum score,  $n = 29$ .

|            | CRS MRI sum score | Total cellcount (cells/mL) | Total protein level (µg/ml) | NE/ALAT (ng/ml) | IL-8 (pg/ml) | IL-6 (fg/ml) | S. aureus | non pathogen (CoNS, Rothia, Corynebacterium, alpha-hemolytic streptococcus) | other/opportunistic pathogen (C. freundii, Klebsiella, Moraxella catarrhalis) |
|------------|-------------------|----------------------------|-----------------------------|-----------------|--------------|--------------|-----------|-----------------------------------------------------------------------------|-------------------------------------------------------------------------------|
| Patient 1  | 9                 | 11.750                     | 246,36                      | 0,94            | 66,14        | 49,35        |           | x                                                                           |                                                                               |
| Patient 2  | 19                | 11.600                     | 29,19                       | 0,65            | 81,88        | 446,74       |           | x                                                                           |                                                                               |
| Patient 3  | 20                | 11.000                     | 224,49                      | 5,48            | 156,65       | 282,61       |           | x                                                                           |                                                                               |
| Patient 4  | 20                | 22.000                     | 415,11                      | 6,27            | 193,71       | 23,83        |           | x                                                                           |                                                                               |
| Patient 5  | 20                | 8.250                      | 221,54                      | 1,87            | 119,51       | 1612,77      |           | x                                                                           |                                                                               |
| Patient 6  | 20                | 18.000                     | 17,61                       | 2,15            | 115,81       | 611,16       | x         | x                                                                           |                                                                               |
| Patient 7  | 20                | 13.250                     | 101,33                      | 11,17           | 332,45       | 6754,27      |           | x                                                                           |                                                                               |
| Patient 8  | 22                | 246.750                    | 380,74                      | 41,90           | 287,38       | 3909,81      | x         | x                                                                           |                                                                               |
| Patient 9  | 25                | 32.500                     | 49,62                       | 1,69            | 33,61        | 257,82       |           |                                                                             |                                                                               |
| Patient 10 | 25                | 5.750                      | 255,74                      | 5,03            | 49,05        | 350,48       |           | x                                                                           | x                                                                             |
| Patient 11 | 26                | 3.250                      | 214,07                      | 2,61            | 45,72        | 3081,36      | x         | x                                                                           |                                                                               |
| Patient 12 | 28                | 19.000                     | 346,36                      | 0,33            | 49,9         | 0            |           | x                                                                           |                                                                               |
| Patient 13 | 28                | 3.500                      | 262,51                      | 0,00            | 27,97        | 138,9        |           | x                                                                           |                                                                               |
| Patient 14 | 30                | 41.500                     | 226,57                      | 1,18            | 132,92       | 378,05       | x         | x                                                                           |                                                                               |
| Patient 15 | 31                | 15.500                     | 133,86                      | 0,18            | 21,19        | 29,76        |           | x                                                                           |                                                                               |
| Patient 16 | 31                | 6.000                      | 28,43                       | 0,80            | 37,03        | 215,05       |           | x                                                                           |                                                                               |
| Patient 17 | 32                | 82.500                     | 253,14                      | 4,54            | 330,77       | 402,13       |           | x                                                                           |                                                                               |
| Patient 18 | 32                | 29.750                     | 77,02                       | 5,91            | 294,74       | 1668,26      |           | x                                                                           | x                                                                             |
| Patient 19 | 33                | 50.250                     | 11,76                       | 5,11            | 73,32        | 743,04       | x         | x                                                                           | x                                                                             |
| Patient 20 | 34                | 32.000                     | 93,10                       | 4,83            | 258,87       | 1.070,09     | x         | x                                                                           |                                                                               |
| Patient 21 | 35                | 22.250                     | 110,21                      | 20,53           | 630,52       | 2.635,41     | x         | x                                                                           |                                                                               |
| Patient 22 | 35                | 28.750                     | 80,67                       | 2,36            | 1.270,54     | 68392,53     | x         | x                                                                           |                                                                               |
| Patient 23 | 37                | 9.250                      | 12,83                       | 3,16            | 100,2        | 198,09       | x         |                                                                             |                                                                               |
| Patient 24 | 38                | 3.000                      | 177,09                      | 0,36            | 44,51        | 144,89       |           | x                                                                           |                                                                               |
| Patient 25 | 39                | 1.750                      | 182,82                      | 1,64            | 25,35        | 79,55        | x         |                                                                             |                                                                               |
| Patient 26 | 40                | 13.500                     | 36,77                       | 8,77            | 64,73        | 609,73       |           | x                                                                           |                                                                               |
| Patient 27 | 41                | 16.750                     | 195,51                      | 50,58           | 1.207,25     | 7.804,66     | x         |                                                                             |                                                                               |
| Patient 28 | 42                | 772.500                    | 93,95                       | 12,80           | 173,98       | 2926,85      |           | x                                                                           |                                                                               |
| Patient 29 | 44                | 7.500                      | 43,43                       | 2,17            | 69,61        | 197,56       |           | x                                                                           | x                                                                             |
